# Supplementary material for: Investigating the potential use of an Antarctic variant of Janthinobacterium lividum for tackling antimicrobial resistance in a One Health approach
Source: PubMed Central journal article supplement (PMC6189184; doi:10.1038/s41598-018-33691-6), 2018-10-15
Supplement: 41598_2018_33691_MOESM1_ESM.pdf [file 41598_2018_33691_MOESM1_ESM.pdf]

## SUPPLEMENTARY FIGURES

### Investigating the potential use of an Antarctic variant of *Janthinobacterium lividum* for tackling antimicrobial resistance in a One Health approach

Andreea Baricz, Adela Teban, Cecilia Maria Chiriac, Edina Szekeres, Anca Farkas, Maria Nica, Amalia Dascălu, Corina Opreșan, Paris Lavin, Cristian Coman

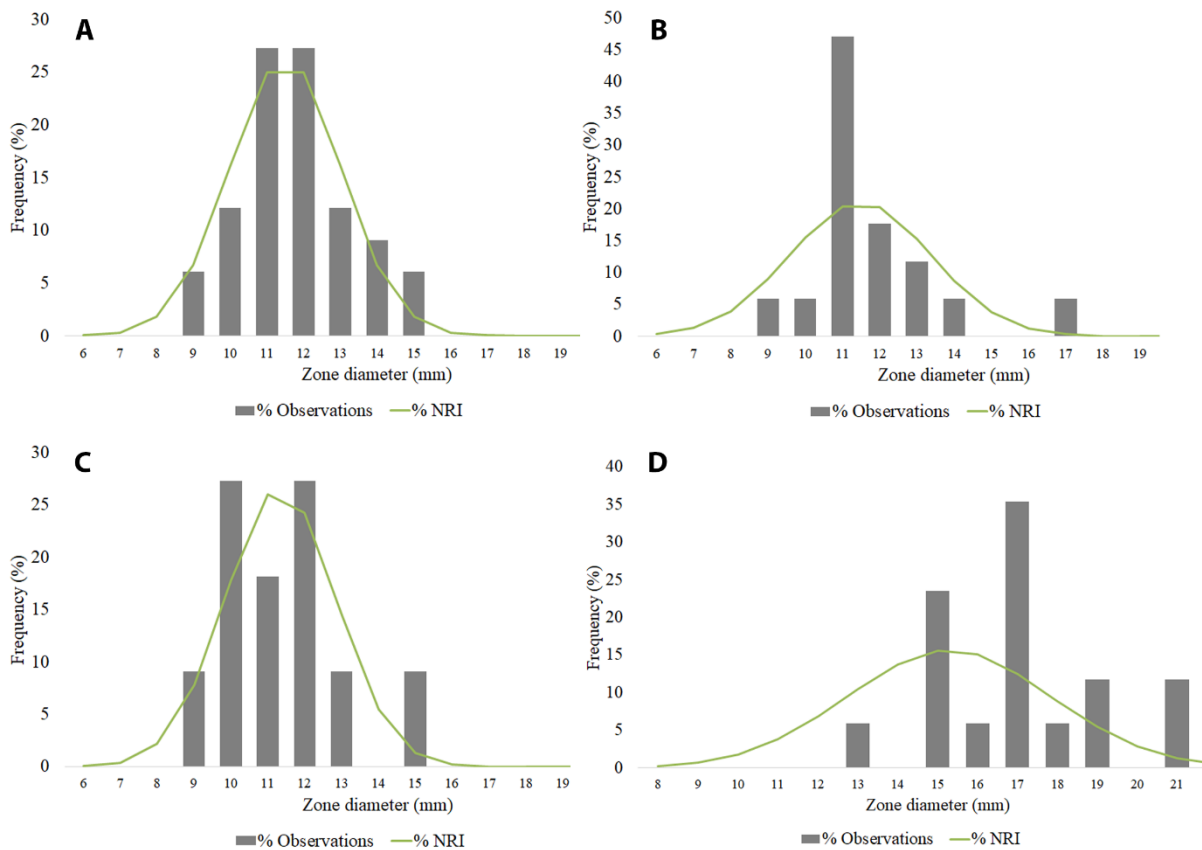

**Suppl. Fig. 1.** Frequencies of the zone diameters and normalized resistance interpretation for *Janthinobacterium lividum* ROICE173 extract with bactericidal effect against MDR bacteria. **A** - Environmental *Enterococcus*. **B** - Environmental *Enterobacteriaceae*. **C** - Clinical *Enterococcus*. **D** - *Staphylococcus*.

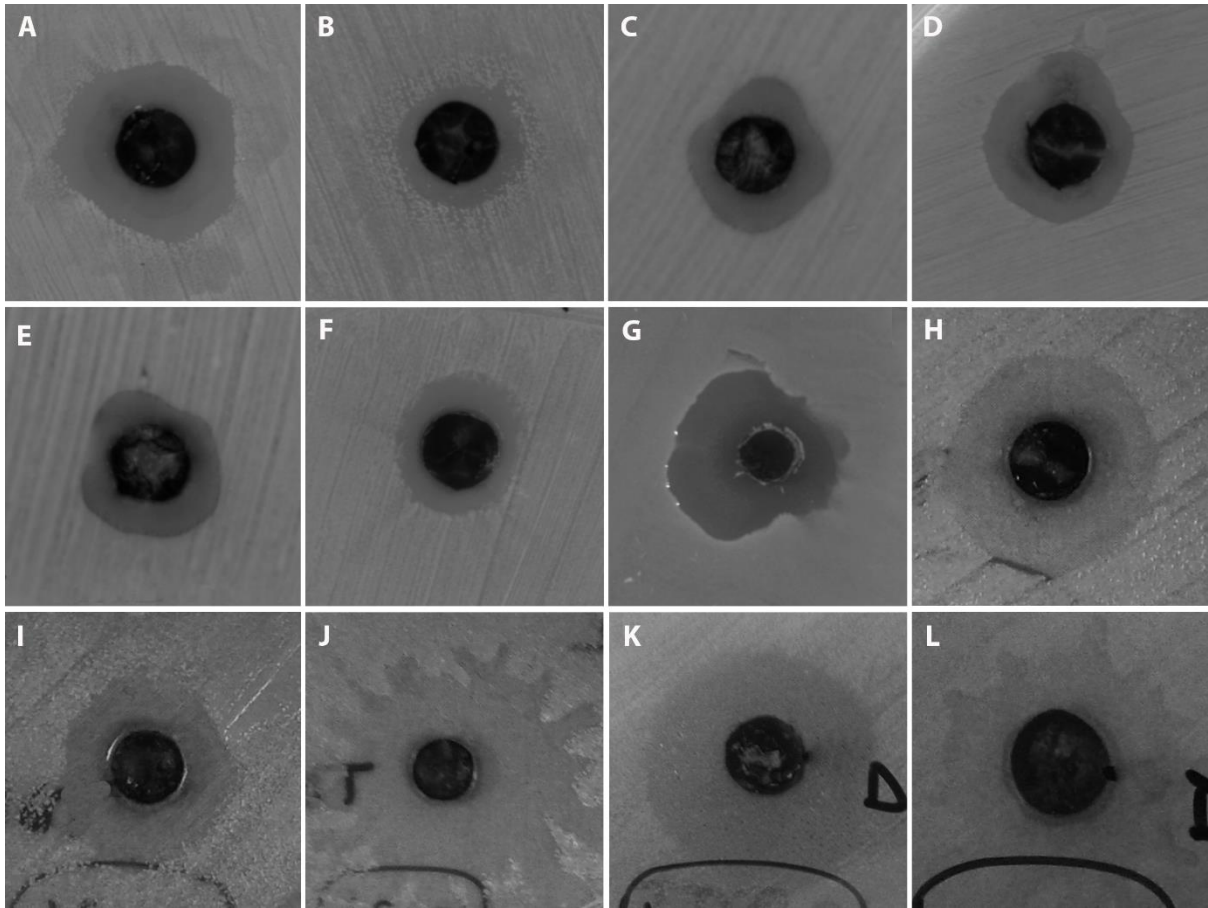

**Suppl. Fig. 2** Example of antimicrobial effect (inhibition zones) of *J. lividum* ROICE173 on MDR bacteria. **A:** CE45 - *Enterococcus faecalis* (environmental isolate). **B:** CE58 - *Enterococcus faecium* (environmental isolate). **C:** EE6 - *Escherichia coli* (environmental isolate). **D:** CI - *Enterococcus faecium* (environmental isolate). **E:** EE16 - *Klebsiella oxytoca* (environmental isolate). **F:** CI23 - *Enterococcus gallinarum* (environmental isolate). **G:** CS5 - *Enterococcus faecium* (environmental isolate). **H:** EK0255 - *Staphylococcus aureus* (clinical isolate). **I:** EK8796 - *Staphylococcus aureus* (clinical isolate). **J:** EH9526 - *Staphylococcus aureus* (clinical isolate). **K:** EK7929 - *Staphylococcus hominis* (clinical isolate). **L:** EK9667 - *Enterococcus faecium vanA* (clinical isolate). Well diameter = 6 mm.

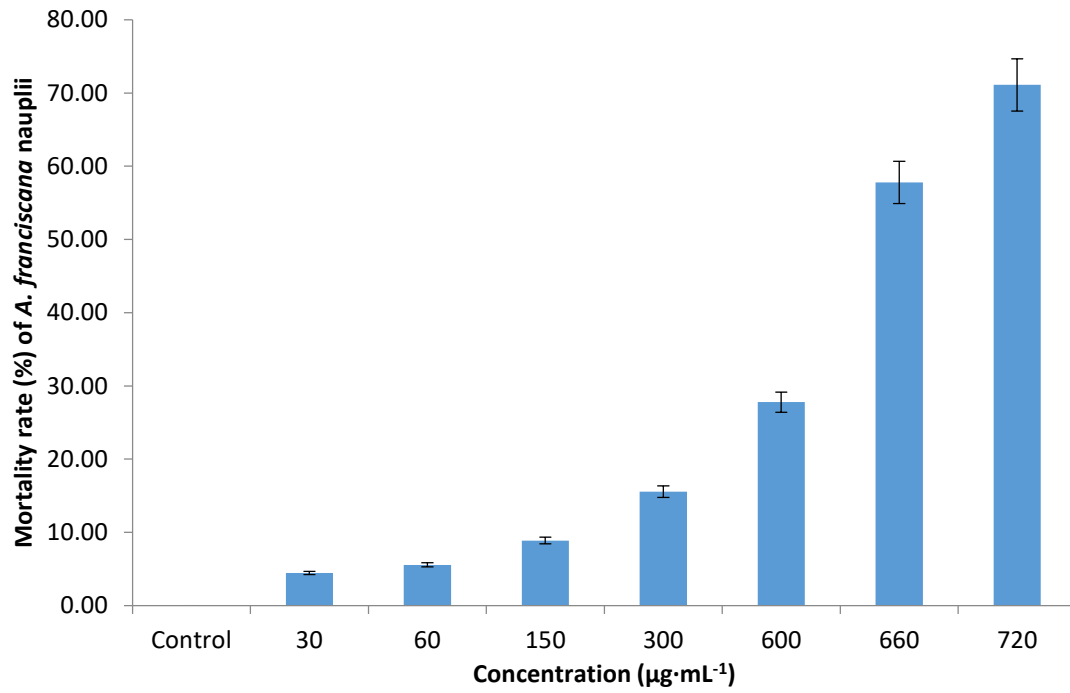

**Suppl. Fig. 3.** Mortality rate of *Artemia franciscana* nauplii against the specified concentration of violacein in the *J. lividum* ROICE173 extract.
